# Supplementary material for: Development and preliminary validation of the 'Caring for Country' questionnaire: measurement of an Indigenous Australian health determinant
Source: Springer Nature journal article supplement (doi:10.1186/1475-9276-7-26), 2008-12-01
Supplement: Additional file 2 [file 1475-9276-7-26-s2.doc]

**Appendix 2: Theoretical dimensions of the Caring for Country questionnaire [38].**

**Land**

**Spirit**

**Body**

An-ngurrugna-wana

Burning

Time on Country

Using Country

Artefact production

Ceremony

Protecting Country
